# Supplementary material
Source: PubMed Central journal article supplement (PMC3587202)
Supplement: 1300928110_pnas.201300928SI.pdf [file 1300928110_pnas.201300928SI.pdf]

# Supporting Information

Morgan et al. 10.1073/pnas.1300928110

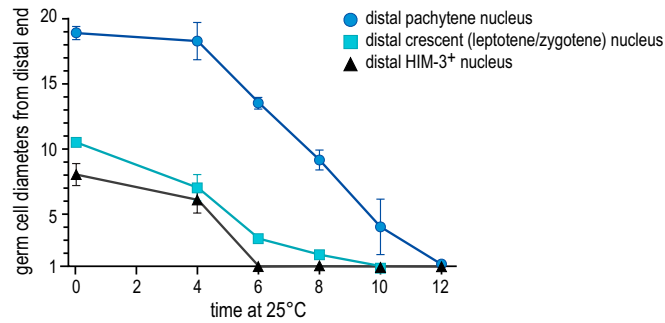

**Fig. S1.** Timing of meiotic entry in the distal germ line of *glp-1(ts);puf-8;lip-1* mutants. *glp-1(ts);puf-8;lip-1* mutants were maintained on plates at permissive temperature (15 °C) until the mid-L4 stage, shifted to restrictive temperature (25 °C), and moved from plates to control chemical media at  $t = 0$  and then stained after defined intervals with DAPI and HIM-3 antibodies to score meiotic entry in cells normally in the mitotic zone (MZ). Position was scored as germ cell diameters (gcd) from the distal end.

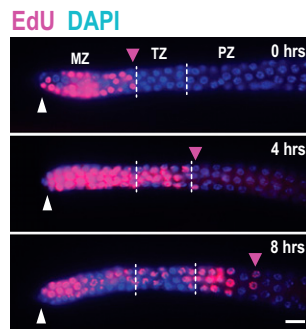

**Fig. S2.** Representative examples of images used to measure the rate of proximal germ cell movement ( $\mu$ ). *puf-8;lip-1* mutants were incubated in 5-ethynyl-2'-deoxyuridine (EdU) for 30 min to label MZ nuclei and then chased in U0126-containing medium without EdU (*Materials and Methods*). The most proximal EdU-positive nuclei (purple arrowhead) move proximally with time. Distal end marked by white arrowhead. Germ-line regions are shown as in Fig. 1.

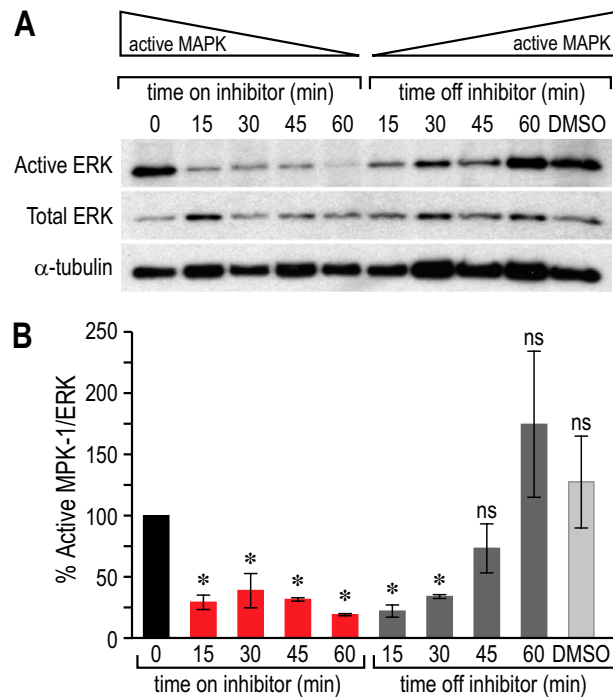

**Fig. S3.** Timing of ERK inhibition and recovery in response to U0126 addition and removal. MPK-1/ERK activity was measured by semiquantitative Western blotting as described previously (1). (A) Representative Western blots of activated MPK-1/ERK (Top), total MPK/ERK (Middle), and tubulin loading control (Bottom) from the same blot membrane. (B) MPK-1/ERK activity measured as in A in three independent experiments. Black bar, untreated; red bars, U0126 present; dark gray bars, U0126 removed; light gray, DMSO control. Bars show average  $\pm$  SEM (\* $P < 0.05$ , Student *t* test). ns, no statistically significant change ( $P > 0.05$ , Student *t* test) vs. untreated control.

- Morgan CT, Lee MH, Kimble J (2010) Chemical reprogramming of *Caenorhabditis elegans* germ cell fate. *Nat Chem Biol* 6(2):102–104.

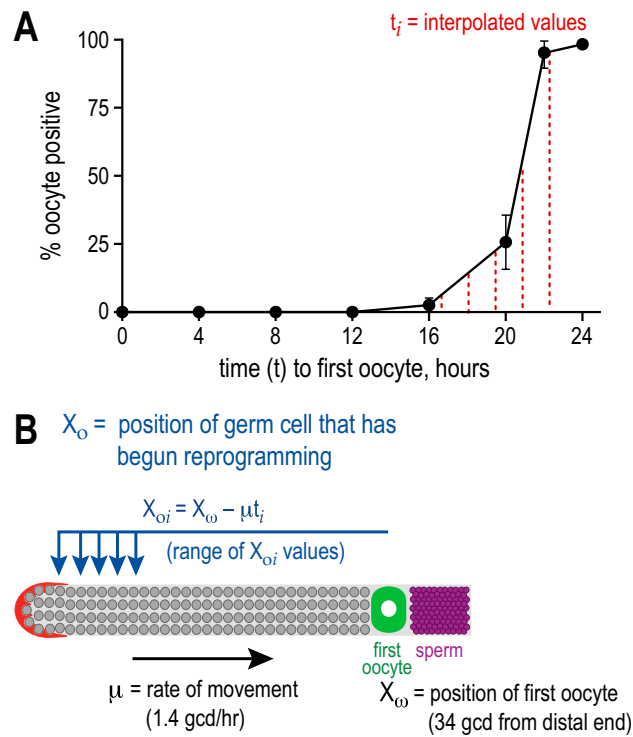

**Fig. S4.** Mapping the region where germ cells initiate sperm-to-oocyte fate reprogramming ( $X_{oi}$ ). (A) Plot of times ( $t$ ) between U0126 addition and appearance of the first oocyte. From this plot,  $t$ -values were interpolated using GraphPad Prism 4 software to generate 93  $t_i$  data points. U0126 depletes active ERK within 15 min (Fig. S3), which is negligible compared with  $t$ -values of 16 to 22 h. Therefore,  $t_i$  values were not corrected for the length of time required for U0126 to deplete ERK activity. (B)  $X_{oi}$  regions were calculated as shown to generate values listed in [Dataset S1](#), and mapped to the distal germ line (arrowheads).

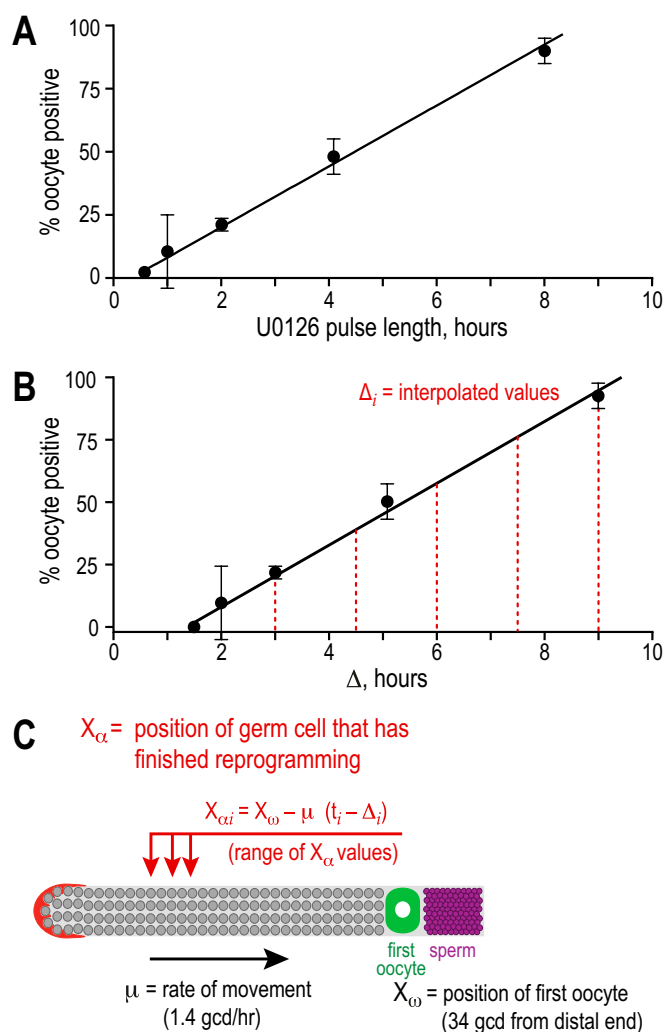

**Fig. S5.** Mapping the region where germ cells complete sperm-to-oocyte fate reprogramming. (A) Plot of U0126 pulse length vs. percent reprogrammed animals. (B) Plot of  $\Delta$ , the U0126 pulse length plus 1 h to correct for time of ERK recovery after U0126 removal. Values for  $\Delta$ , were interpolated using the slope–intercept formula,  $y = mx + b$ . (C)  $X_{\alpha i}$  values were calculated as shown to generate values listed in [Dataset S2](#), and are mapped to the distal germ line (arrowheads).

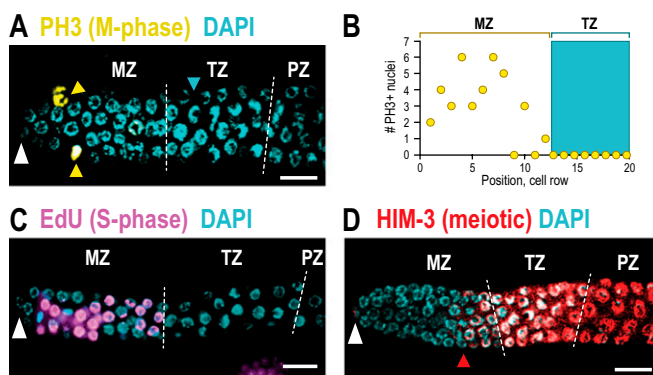

**Fig. S6.** Mapping the position of meiotic entry in *puf-8;lip-1* germ lines. (A, C, and D) Images of the distal end of extruded germ lines. Conventions are as in Fig. 1 legend. (Scale bars, 10  $\mu\text{m}$ .) (A) DAPI and phosphohistone-H3 staining showing that mitotic M-phase cells (yellow, arrowheads) are limited to the MZ. Crescent-shaped nuclei (blue arrowhead) diagnostic of early meiotic prophase (leptotene/zygotene) were found from rows  $13 \pm 1$  through  $20 \pm 1$  (average  $\pm$  SD;  $n = 29$ ). (B) Plot of phosphohistone 3-positive nuclei (yellow circles) as a function of germ cell position. Phosphohistone-3-positive nuclei were restricted to rows 1 to 12, with the vast majority in rows 1 to 10 ( $n = 15$  germ lines). Blue box indicates transition zone. (C) A 30-min pulse of thymidine analogue EdU labeled S-phase nuclei (purple), and DAPI staining labeled all nuclei. S-phase nuclei were restricted to rows 1 to  $13.5 \pm 1.8$  (average  $\pm$  SD;  $n = 10$ ). (D) HIM-3 staining as a molecular marker of meiotic entry. Red triangle marks distal-most position of HIM-3 staining. Note that this molecular marker of meiosis is on chromosomes before the morphologically apparent crescent shaped nuclei of meiotic leptotene/zygotene. Chromosomal HIM-3 (red) extended proximally from row  $11 \pm 2$  (average  $\pm$  SD;  $n = 11$ ).

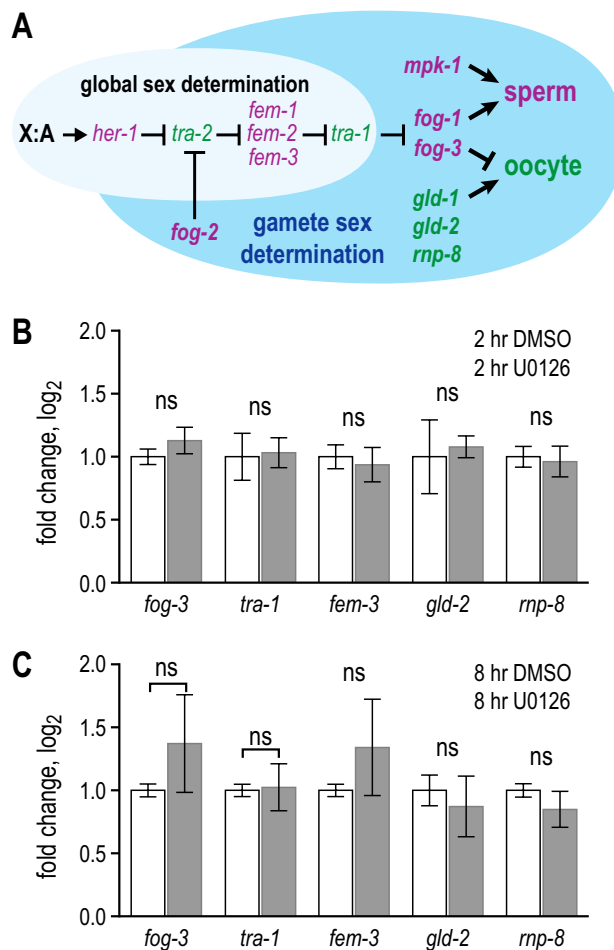

**Fig. S7.** Quantitative PCR analysis of mRNAs encoding sperm–oocyte fate regulators. (A) Schematic of the gamete sex determination network [adapted from Kimble and Crittenden (1)]. (B) mRNA abundances of key sperm–oocyte regulators after 2 h of treatment with DMSO (white bars) or U0126 (black bars). These changes were not statistically significant ( $P < 0.05$ ) by Student  $t$  test. (C) mRNA abundances of the same regulators after 8 h of DMSO or U0126 treatment. None of the changes were significant by Student  $t$  test. Graphs show average  $\pm$  SEM; ns, not statistically significant.

1. Kimble J, Crittenden SL (2007) Controls of germline stem cells, entry into meiosis, and the sperm/oocyte decision in *Caenorhabditis elegans*. *Annu Rev Cell Dev Biol* 23:405–433.

**Dataset S1. Data and calculations for mapping  $X_{\sigma_i}$ , the initiation site of reprogramming**

[Dataset S1](#)

**Dataset S2. Data and calculations for mapping  $X_{\omega_i}$ , the site of reprogramming completion**

[Dataset S2](#)
